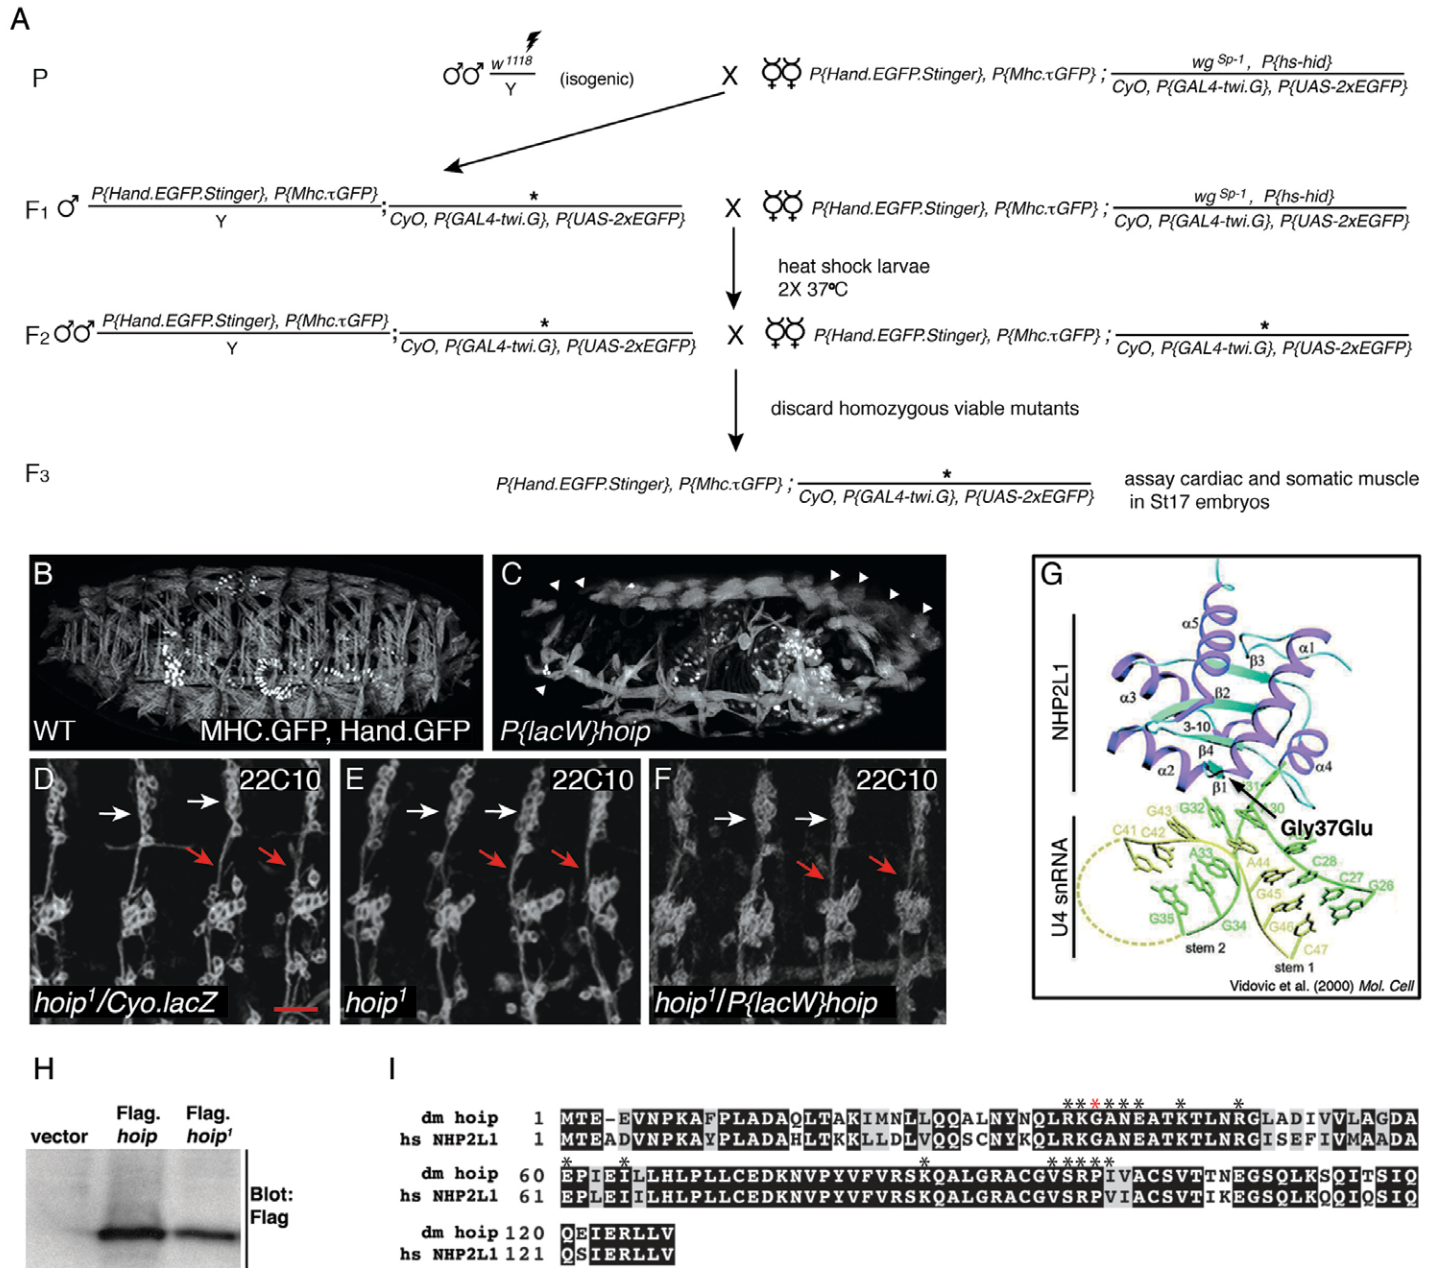

**Fig. S1. A forward genetic screen identified Hoip as a novel regulator of mesoderm development.** (A) Crossing scheme to generate EMS mutants in a double GFP reporter background. Over 10,000 mutagenized genomes were screened. (B,C) MHC.τGFP, Hand.n-GFP expression in St17 embryos. Compared with wild-type embryos (B),  $P\{lacW\}hoip^{k07104}$  homozygous embryos (C) show severe muscle defects and apparent segmentation defects (white arrowheads). (D-F) St16 embryos stained with the PNS marker 22C10. Micrographs show four dorsal neuron clusters. The organization of the dorsal clusters (white arrows) and the pathway of the descending nerve (red arrows) are comparable among  $hoip^1/Cyo$  (D),  $hoip^1$  (E) and  $hoip^1/P\{lacW\}hoip^{k07104}$  (F) embryos. (G) Crystal structure of hNHP2L1 bound to U4 snRNA as reported previously (Vidovic et al., 2000), except the position of the 37th residue (mutated in  $hoip^1$  embryos) is shown. (H) α-Flag western blot from COS cells transfected with empty pcDNA.Flag, pcDNA.Flag.Hoip or pcDNA.Flag.Hoip<sup>1</sup>. (I) Alignment of Hoip and hNHP2L1 protein sequence. The two proteins are 79% identical and 89% similar. hNHP2L1 amino acids required for RNA binding are indicated with an asterisk (Schultz et al., 2006). The red asterisk shows the position of the  $hoip^1$  missense mutation. Scale bar: 20μm.

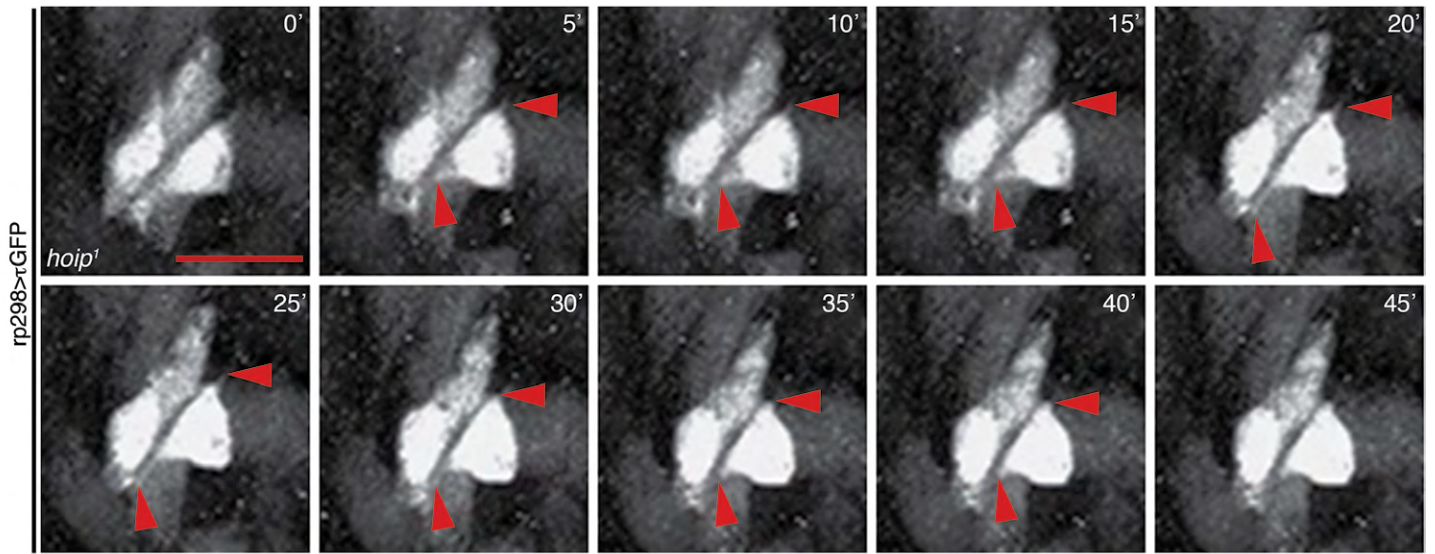

**Fig. S2. Somatic muscles in *hoip* embryos extend filopodia in the direction of polarization.** Time-lapse images of *rp298. gal4>τGFP hoip<sup>1</sup>* somatic muscles beginning at late St12. Filopodia extend in the axis of myotube polarization (red arrowheads) and then retract. Scale bar: 10  $\mu$ m.

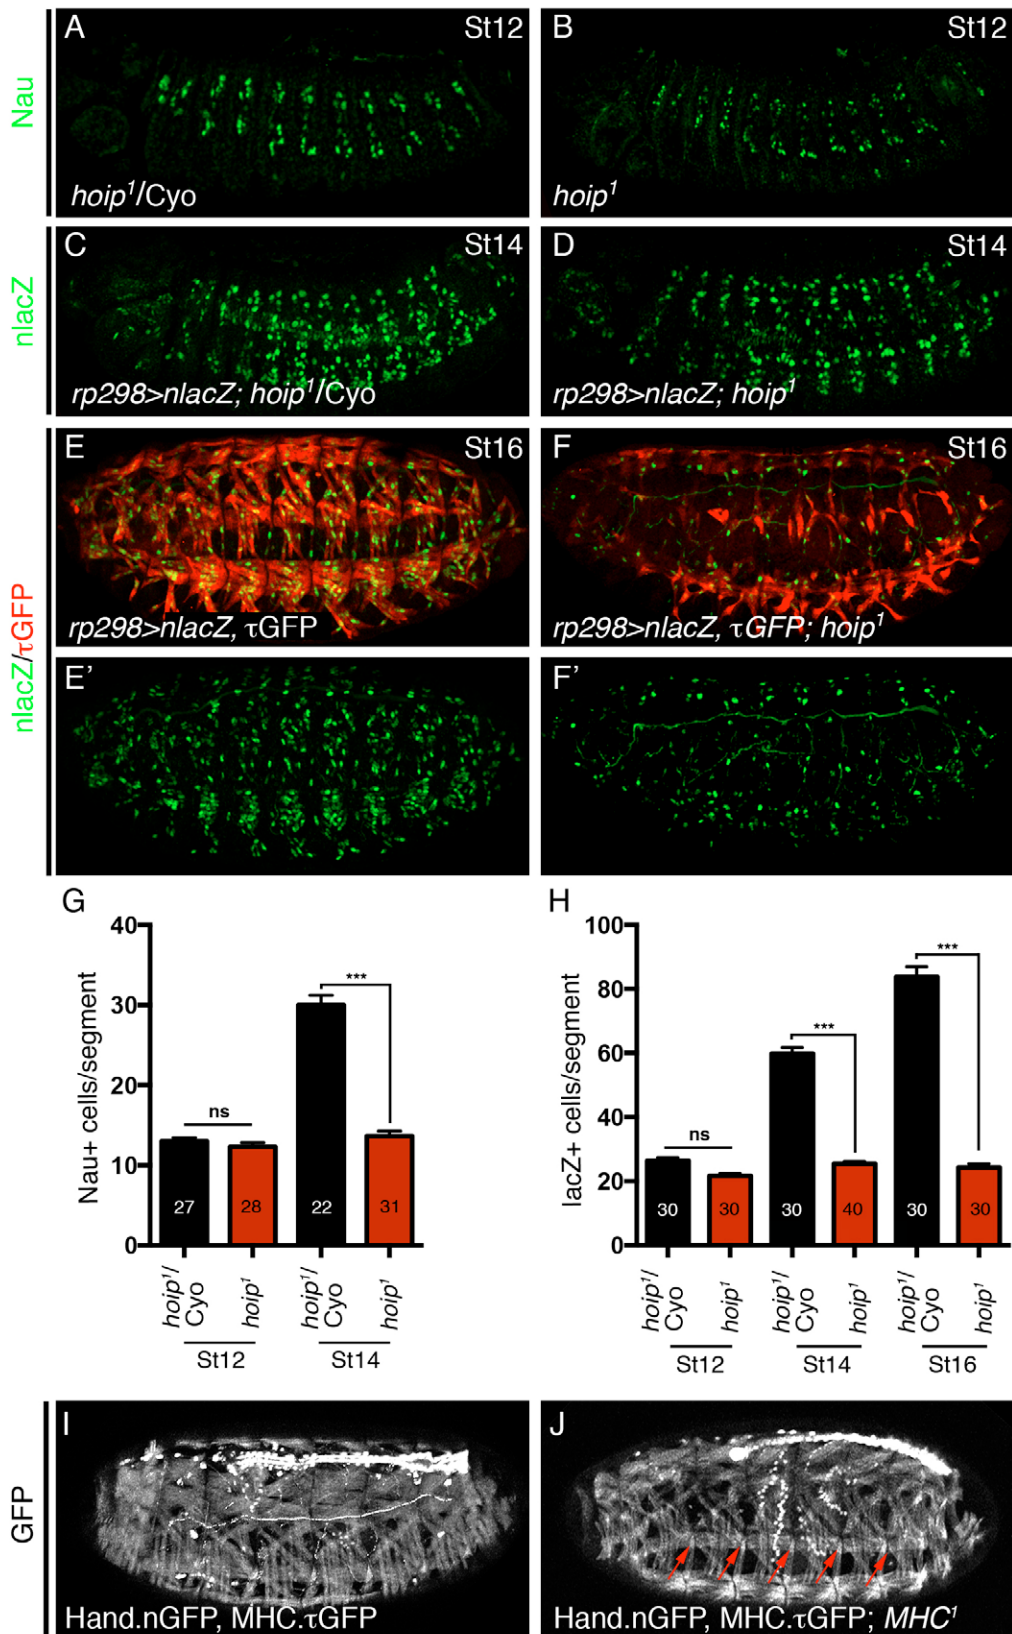

**Fig. S3. Muscle morphology and identity gene expression.** (A,B) Nau expression in St12 embryos. The number of Nau+ nuclei is comparable between control and *hoip<sup>1</sup>* embryos. (C,D) *rp298.lacZ* expression in St12 embryos. The number of lacZ+ nuclei is comparable between control and *hoip<sup>1</sup>* embryos. (E,F) St16 *rp298.gal4>τ.GFP*, *rp298.nlacZ* embryos double-labeled for GFP (red) and lacZ (green). *hoip<sup>1</sup>* embryos showed a significant reduction in the number of lacZ+ nuclei (F) compared with wild type (E). (G,H) Quantification of Nau+ and *rp298.lacZ*+ positive nuclei in the dorsal mesoderm. The number of segments quantified is given for each genotype and time point. Unpaired *t*-tests were performed to establish significance. Error bars represent s.e.m. (I,J) MHC.τGFP, Hand.nGFP expression in St16 embryos. (I) Wild-type and (J) *MHC<sup>1</sup>* embryos show similar somatic muscle morphology. In particular LL1/DO5 muscles have elongated and attached in all segments (red arrows). ns, not significant; \*\*\**P*<0.001.

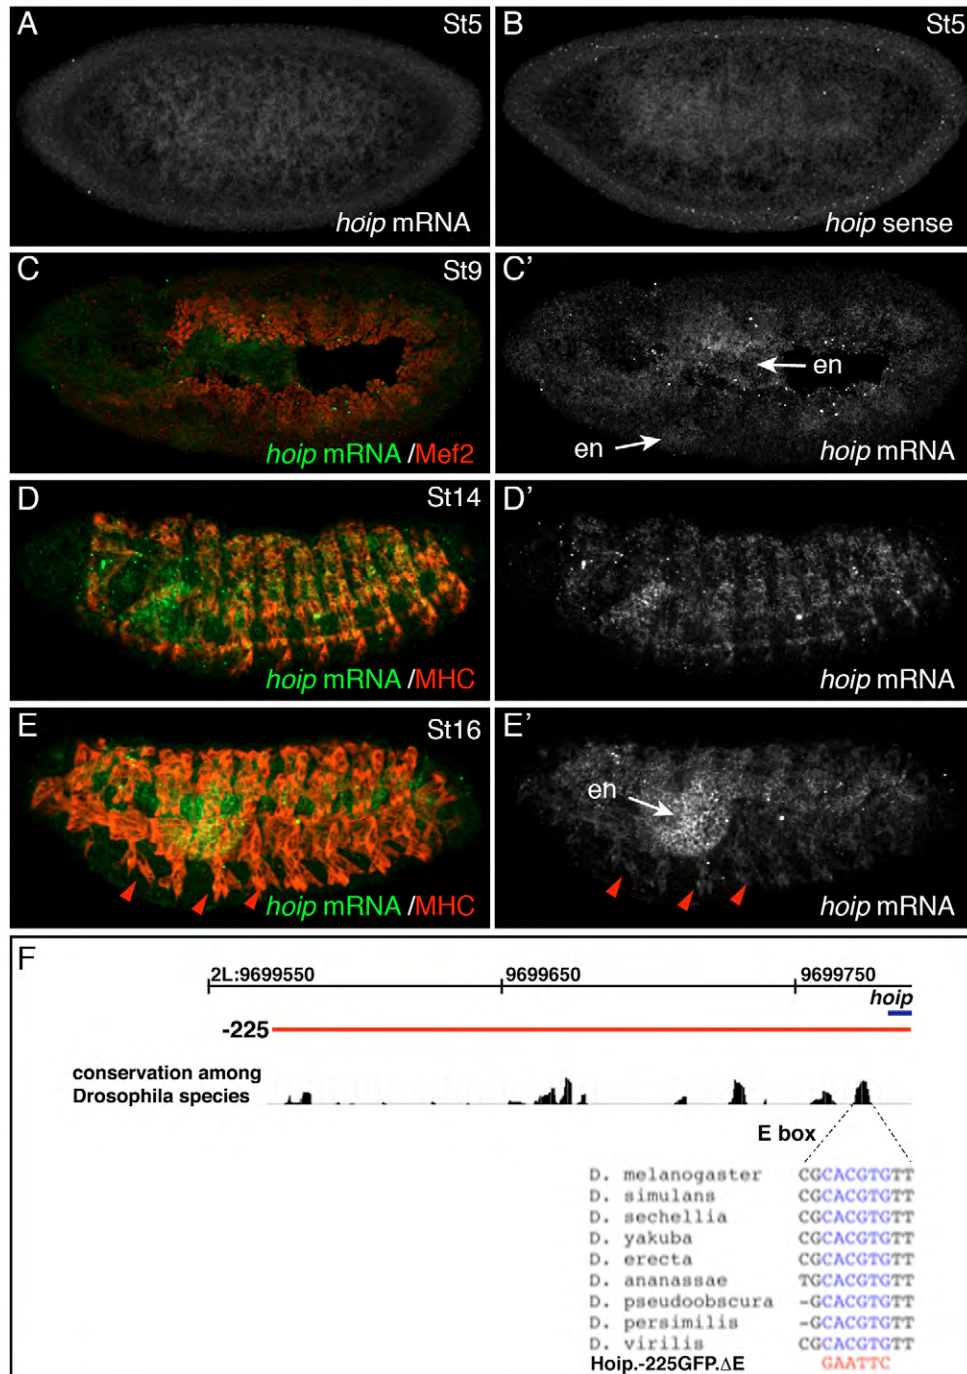

**Fig. S4. *hoip* expression during embryonic development.** (A-E) Wild-type embryos hybridized with RNA probes antisense (A,C-E) or sense (B) to the *hoip* mRNA. (A,B) Post-cellularization blastoderm embryos. Fluorescent intensity is comparable between the antisense and sense probes. (C) St9 embryo co-labeled for *hoip* (green) and Mef2 (red). Weak *hoip* expression has initiated in the endoderm and mesoderm. (D,E) St14 (D) and St16 (E) embryos co-labeled for *hoip* (green) and MHC (red). *hoip* is expressed at high levels in the endoderm (en) and at lower levels in the somatic musculature (red arrowheads). (F) Genomic conservation 225 bp 5' to the *hoip* transcriptional start site. The highly conserved E-box sequence and mutations in Hoip.-225.ΔEGFP are shown. Genomic coordinates refer to base pair positions along chromosome 2L.

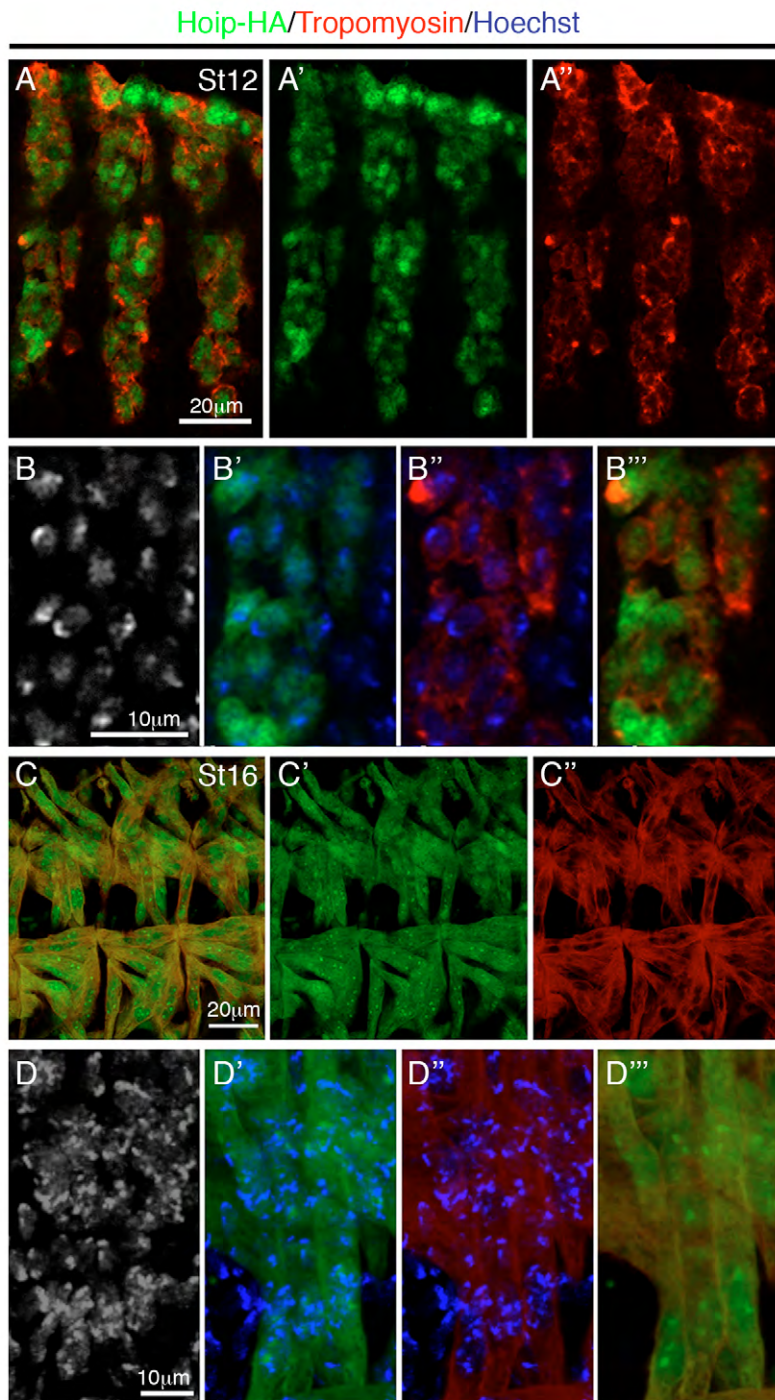

**Fig. S5. Hoip localizes to both the nucleus and the cytoplasm.** (A-D) *Mef2>Hoip-HA* embryos co-labeled for HA (green) and Tropomyosin (red). (A,B) Hoip is largely localized to the nucleus in St12 embryos, although some cytoplasmic staining is present. (C,D) Hoip is localized throughout the myofibers of St16 embryos. Enhanced localization is apparent in a subnuclear domain.

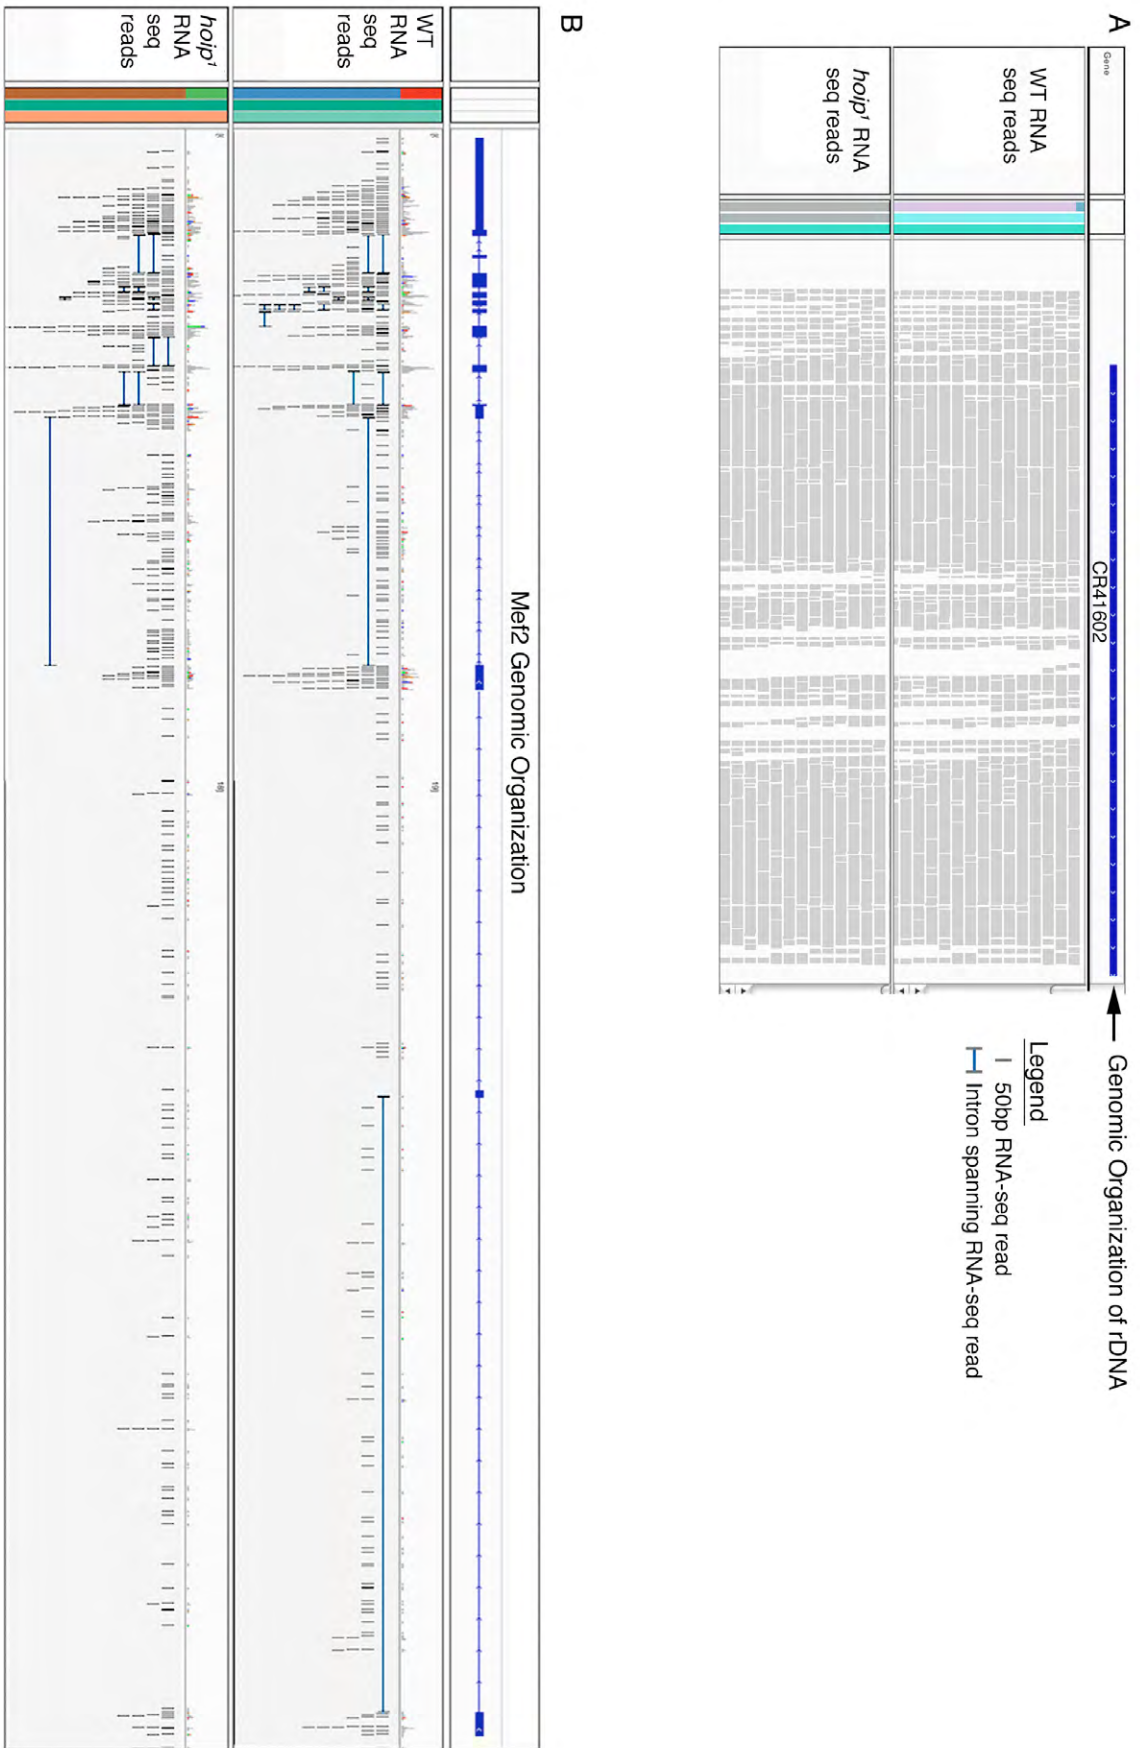

**Fig. S6. rRNA processing and *Mef2* expression are not affected in *hoip*<sup>1</sup> embryos.** (A,B) Screen shot from Integrative Genome Viewer at the rDNA locus (A; CR41602) and the *Mef2* locus (B) showing RNA-seq reads from wild-type and *hoip*<sup>1</sup> embryos. Vertical grey bars represent a single sequencing read. Horizontal blue lines indicate a sequencing read across an intron. The number and positions of RNA-seq reads is comparable between genotypes at both loci.

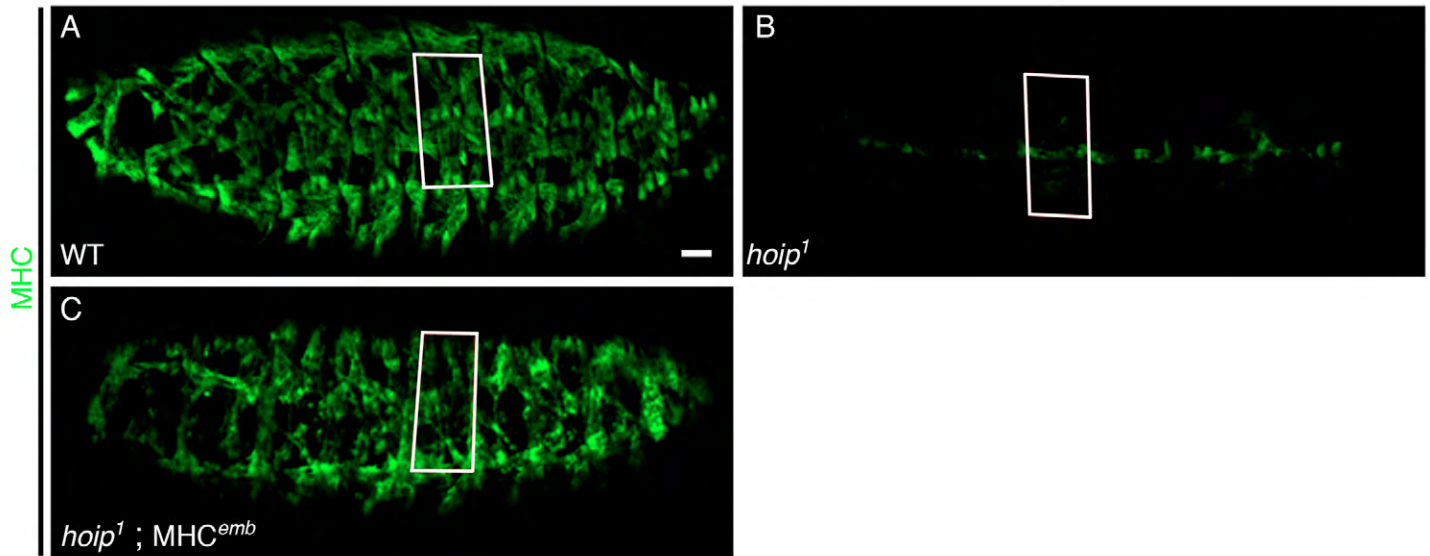

**Fig. S7. Method to quantify MHC expression by mean fluorescence intensity.** (A-C) Z-stacks including only the somatic muscles from St16 embryos stained for MHC. MHC expression was clearly restored in *hoip*<sup>1</sup> embryos by *MHC*<sup>emb</sup>; however, muscle morphology was not (compare A with C). To quantify MHC expression in the somatic musculature (SM), we used the Zeiss LSM Zen 2011 software to trace the medial region of a segment using SBMs to define anterior-posterior position of each segment (white boxes). The software then calculated mean fluorescent intensity (MFI) within each boxed region. We also measured fluorescent intensity in the visceral musculature (VM). To normalize MHC expression, we divided SM MFI by VM MFI to obtain relative fluorescence for each segment.

**A**

|            |     |                                                               |
|------------|-----|---------------------------------------------------------------|
| hoip       | 1   | MTE-EVNPKAFPLADAQLTAKIMNLLQOALNYNQLRKGANEATKTLNRGLADIVVLAGDA  |
| dr nhp211b | 1   | MTEAEVNPKAYPLADATLSKTILDLVQOASNYKQLRKGANEATKTLNRGISEFIVMAADA  |
| hoip       | 60  | EPLEILLHLPLLCEKKNVPYVFRSKQALGRACGVS RPIVACSVTTNEGSOLKSOITSIQ  |
| dr nhp211b | 61  | EPLEILLHLPLLCEKKNVPYVFRSKQALGRACGVS RPIVIATSVTIKEGSOLKPOIOSVQ |
| hoip       | 120 | QETIERLLV                                                     |
| dr nhp211b | 121 | MAIERLLV                                                      |

**B**

|           |    |                             |
|-----------|----|-----------------------------|
| ATG-MO    | 3' | TTCTACTGACTTCGACTTCACTTGG5' |
| nhp211b   | 5' | AAGATGACTGAAGCTGAAGTGAACC3' |
| nhp211a   | 5' | GAAATGCTGAATCTGACGTGAACC3'  |
| 5' UTR-MO | 3' | CTCTCCTGGCACACAATAATTCATT5' |
| nhp211b   | 5' | GAGAGACCGTGTGTGTTAAGTAA3'   |
| nhp211a   |    | NO SIGNIFICANT ALIGNMENT    |

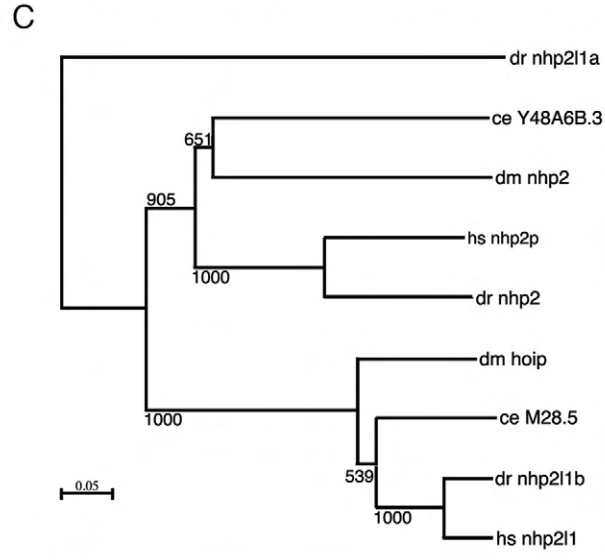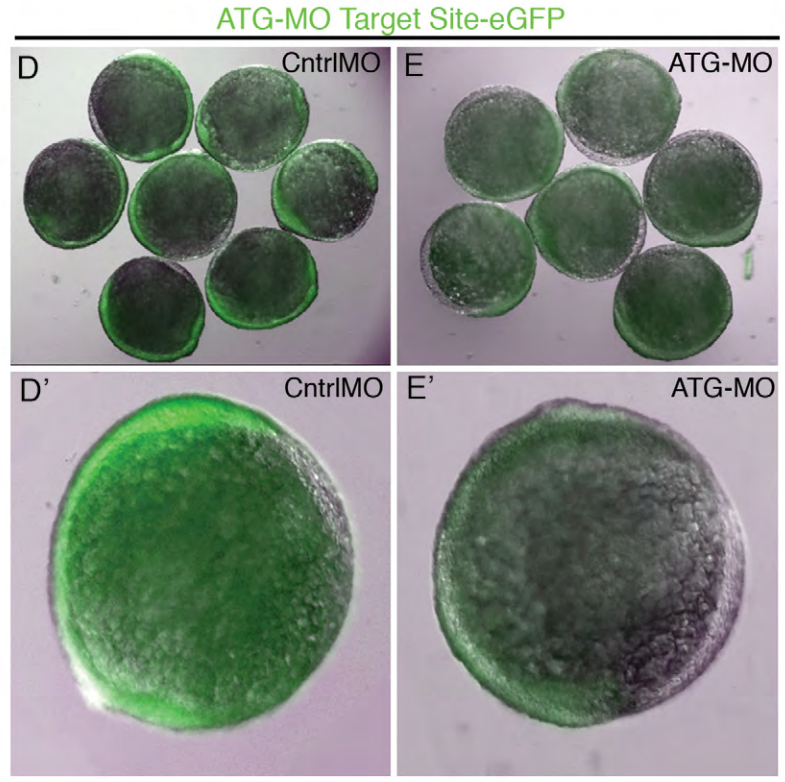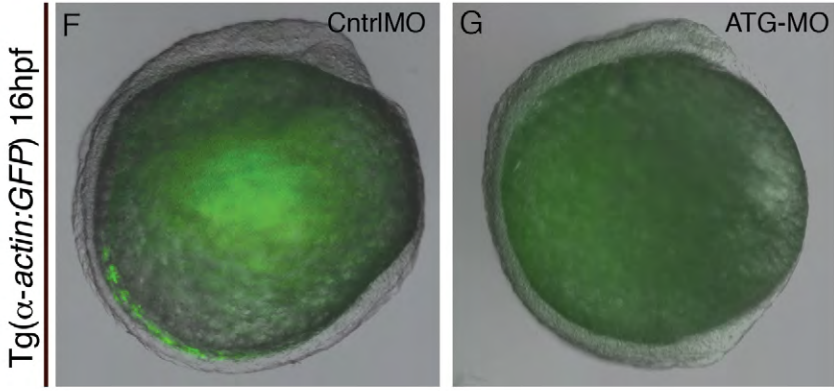

**Fig. S8. *nhp211b* is a Hoip orthologue and the *nhp211b* ATG-MO efficiently blocks translation.** (A) Alignment between Hoip and zebrafish *nhp211b* protein sequences. Identical amino acids are shaded black; similar amino acids are shaded gray. (B) Alignment of the *nhp211a/b* translational start sequences with the ATG-MO and 5'UTR-MO. Target nucleotides are red. The beginning of the ORF is underlined. (C) Phylogenetic analysis of NHP2 and NHP2L1 proteins in worms (ce), flies (dm), zebrafish (dr) and humans (hs). Bootstrap values are given. (D) Zebrafish embryos co-injected with Control-MO and an eGFP construct containing the *nhp211b* target site in the 5'UTR show robust eGFP expression at 12 hpf. (E) Embryos co-injected with ATG-MO and the same eGFP construct as in D show a significant reduction in eGFP expression. (F,G) Tg( $\alpha$ -actin:GFP) embryos injected with ATG-MO did not develop beyond 16 hpf.



**Table S1. Muscle development in *hoip* embryos**

| Muscle*                                                                           | <i>DOI</i>  | <i>DO2</i>  | <i>DA</i>  | <i>DO</i>  | <i>DO</i>  | <i>DO</i>  | <i>LTI-</i> | <i>DT</i>  | <i>LO</i>  | <i>SBM</i> | <i>VO</i>  | <i>VA</i>  |
|-----------------------------------------------------------------------------------|-------------|-------------|------------|------------|------------|------------|-------------|------------|------------|------------|------------|------------|
|                                                                                   |             |             | 3          | 3          | 4          | 5          | 4           | 1          | 1          |            | 1-3        | 1-2        |
| <i>hoip</i> <sup>1</sup>                                                          | 97<br>(36)  | 94<br>(36)  | 33<br>(36) | 13<br>(36) | 38<br>(36) | 19<br>(36) | 47<br>(144) | 91<br>(36) | 47<br>(36) | 94<br>(36) | 61<br>(90) | 64<br>(62) |
| <i>hoip</i> <sup>1</sup> /Df(2L)ED690                                             | 77<br>(31)  | 100<br>(31) | 38<br>(31) | 16<br>(31) | 54<br>(31) | 32<br>(31) | 41<br>(124) | 93<br>(31) | 41<br>(31) | 67<br>(31) | 52<br>(93) | 77<br>(62) |
| <i>hoip</i> <sup>1</sup> / <i>P</i> { <i>lacW</i> } <i>hoip</i> <sup>K07104</sup> | 100<br>(34) | 100<br>(34) | 53<br>(34) | 14<br>(34) | 44<br>(34) | 41<br>(34) | 33<br>(136) | 76<br>(34) | 50<br>(34) | 91<br>(34) | 71<br>(66) | 75<br>(48) |
| <i>P</i> { <i>lacW</i> } <i>hoip</i> <sup>K07104</sup>                            | 86<br>(22)  | 78<br>(22)  | 9<br>(22)  | 0<br>(22)  | 18<br>(22) | 18<br>(22) | 4<br>(88)   | 36<br>(22) | 4<br>(22)  | 59<br>(22) | 16<br>(66) | 23<br>(44) |

\*Muscles extending across the segment scored positive

Data are percentage of positive muscles (number of muscles scored)

**Table S2. Differential gene expression in 6-10 hour *hoip*<sup>1</sup> embryos**

| <b>Gene</b> | <b>Wild-type value</b> | <b><i>hoip</i> value</b> | <b>Fold change</b> | <b><i>P</i> value</b> |
|-------------|------------------------|--------------------------|--------------------|-----------------------|
| abba        | 25.7008                | 0.3275                   | 0.01274            | 0.00002               |
| Acs1        | 193.6320               | 82.4571                  | 0.42584            | 0.00143               |
| Actn        | 235.0040               | 103.6920                 | 0.44124            | 0.00014               |
| Adh         | 308.0260               | 45.7923                  | 0.14866            | 0.00000               |
| Adk1        | 66.7169                | 5.9337                   | 0.08894            | 0.00033               |
| Ahcy13      | 355.8390               | 152.4240                 | 0.42835            | 0.00401               |
| alphaTub85E | 99.3420                | 25.6589                  | 0.25829            | 0.00004               |
| arg         | 285.5680               | 34.4369                  | 0.12059            | 0.00445               |
| Atf6        | 184.9760               | 74.7937                  | 0.40434            | 0.00113               |
| ATPsyn-g    | 620.1150               | 296.6300                 | 0.47835            | 0.00164               |
| betaTub97EF | 124.1460               | 13.9371                  | 0.11226            | 0.00000               |

|             |           |          |         |         |
|-------------|-----------|----------|---------|---------|
| BM-40-SPARC | 197.7130  | 54.6709  | 0.27652 | 0.00022 |
| bt          | 248.1740  | 13.6823  | 0.05513 | 0.00000 |
| Ca-alpha1D  | 27.9455   | 10.2013  | 0.36505 | 0.00417 |
| Ca-beta     | 24.3753   | 2.5030   | 0.10268 | 0.00062 |
| cals        | 521.7950  | 248.3170 | 0.47589 | 0.00810 |
| CaMKI       | 182.9920  | 64.2499  | 0.35111 | 0.00020 |
| CAP         | 86.9704   | 36.7742  | 0.42284 | 0.00011 |
| Caps        | 179.0760  | 75.8946  | 0.42381 | 0.00000 |
| Cda4        | 140.2440  | 65.9648  | 0.47036 | 0.00617 |
| Cf2         | 66.7754   | 20.9347  | 0.31351 | 0.00101 |
| CG10249     | 65.6698   | 27.0462  | 0.41185 | 0.00023 |
| CG10591     | 2167.7900 | 628.6480 | 0.29000 | 0.00000 |
| CG10625     | 96.9136   | 2.9092   | 0.03002 | 0.00000 |
| CG10737     | 142.7700  | 42.1398  | 0.29516 | 0.00000 |
| CG11155     | 26.3139   | 6.6147   | 0.25138 | 0.00258 |

|         |          |         |         |         |
|---------|----------|---------|---------|---------|
| CG11198 | 81.6923  | 31.6125 | 0.38697 | 0.00047 |
| CG11255 | 199.1450 | 88.5562 | 0.44468 | 0.00039 |
| CG11658 | 124.5830 | 58.0435 | 0.46590 | 0.00199 |
| CG11883 | 17.8655  | 1.6973  | 0.09500 | 0.00033 |
| CG12769 | 27.3271  | 8.2212  | 0.30084 | 0.00727 |
| CG13124 | 34.9772  | 12.4803 | 0.35681 | 0.00720 |
| CG13183 | 30.3052  | 5.5422  | 0.18288 | 0.00318 |
| CG13397 | 70.7670  | 21.9354 | 0.30997 | 0.00209 |
| CG13698 | 145.5600 | 53.7993 | 0.36960 | 0.00039 |
| CG14265 | 191.3600 | 0.0000  | 0.00000 | 0.00023 |
| CG14817 | 589.0110 | 97.1897 | 0.16500 | 0.00833 |
| CG14869 | 32.6878  | 11.2547 | 0.34431 | 0.00039 |
| CG15093 | 157.8800 | 12.2214 | 0.07741 | 0.00000 |
| CG15251 | 34.8088  | 1.9145  | 0.05500 | 0.00643 |
| CG15309 | 53.2676  | 15.7721 | 0.29609 | 0.00827 |

|         |          |         |         |         |
|---------|----------|---------|---------|---------|
| CG15618 | 29.7964  | 9.6678  | 0.32446 | 0.00003 |
| CG15822 | 45.2577  | 17.9422 | 0.39644 | 0.00026 |
| CG1607  | 68.4284  | 23.6532 | 0.34566 | 0.00357 |
| CG1674  | 104.1200 | 3.5355  | 0.03396 | 0.00001 |
| CG16884 | 156.7830 | 1.3108  | 0.00836 | 0.00000 |
| CG16885 | 247.5510 | 2.8119  | 0.01136 | 0.00004 |
| CG17549 | 104.3110 | 13.2131 | 0.12667 | 0.00017 |
| CG17598 | 164.8950 | 69.0480 | 0.41874 | 0.00311 |
| CG1764  | 62.8433  | 21.1004 | 0.33576 | 0.00455 |
| CG17816 | 34.8959  | 12.4392 | 0.35647 | 0.00207 |
| CG1824  | 81.5638  | 40.0639 | 0.49120 | 0.00400 |
| CG18522 | 38.5264  | 18.1660 | 0.47152 | 0.00566 |
| CG18661 | 32.8536  | 5.0490  | 0.15368 | 0.00362 |
| CG18675 | 15.8026  | 1.5630  | 0.09891 | 0.00653 |
| CG2219  | 143.0870 | 56.4341 | 0.39441 | 0.00381 |

|         |          |          |         |         |
|---------|----------|----------|---------|---------|
| CG2930  | 66.8025  | 6.7124   | 0.10048 | 0.00001 |
| CG2950  | 68.0822  | 34.2304  | 0.50278 | 0.00443 |
| CG2962  | 372.1370 | 100.6710 | 0.27052 | 0.00003 |
| CG30101 | 96.4232  | 11.8547  | 0.12294 | 0.00004 |
| CG3011  | 106.0890 | 34.2676  | 0.32301 | 0.00327 |
| CG30458 | 44.2715  | 0.7229   | 0.01633 | 0.00007 |
| CG30460 | 78.2668  | 31.4999  | 0.40247 | 0.00002 |
| CG31004 | 88.4885  | 17.5975  | 0.19887 | 0.00000 |
| CG31140 | 58.8638  | 19.0361  | 0.32339 | 0.00000 |
| CG31323 | 20.3243  | 1.9758   | 0.09721 | 0.00058 |
| CG3164  | 354.7930 | 173.0310 | 0.48769 | 0.00035 |
| CG31999 | 54.3378  | 10.3593  | 0.19064 | 0.00000 |
| CG32352 | 17.0136  | 1.9147   | 0.11254 | 0.00009 |
| CG32373 | 26.2502  | 3.7408   | 0.14250 | 0.00380 |
| CG32581 | 33.2508  | 2.7799   | 0.08360 | 0.00151 |

|         |          |         |         |         |
|---------|----------|---------|---------|---------|
| CG32813 | 97.8948  | 46.8468 | 0.47854 | 0.00294 |
| CG33144 | 47.1899  | 23.2984 | 0.49371 | 0.00270 |
| CG33205 | 151.1240 | 9.7741  | 0.06468 | 0.00000 |
| CG33977 | 733.7690 | 54.7722 | 0.07465 | 0.00085 |
| CG3588  | 54.3898  | 5.6839  | 0.10450 | 0.00001 |
| CG3793  | 69.7514  | 16.3636 | 0.23460 | 0.00510 |
| CG40263 | 77.1697  | 14.6049 | 0.18926 | 0.00005 |
| CG42326 | 24.2489  | 0.4969  | 0.02049 | 0.00018 |
| CG42492 | 84.9767  | 30.5867 | 0.35994 | 0.00000 |
| CG42527 | 185.2060 | 89.3761 | 0.48258 | 0.00129 |
| CG42533 | 45.7777  | 19.2573 | 0.42067 | 0.00501 |
| CG42673 | 77.4045  | 32.9339 | 0.42548 | 0.00614 |
| CG42741 | 20.4978  | 1.1266  | 0.05496 | 0.00641 |
| CG4467  | 40.2310  | 18.5803 | 0.46184 | 0.00049 |
| CG4562  | 34.0110  | 2.9619  | 0.08709 | 0.00001 |

|        |           |          |         |         |
|--------|-----------|----------|---------|---------|
| CG4692 | 912.1890  | 414.2920 | 0.45417 | 0.00773 |
| CG4822 | 63.7431   | 15.4715  | 0.24272 | 0.00014 |
| CG5080 | 476.0120  | 126.7830 | 0.26634 | 0.00000 |
| CG5322 | 36.5403   | 7.3002   | 0.19978 | 0.00082 |
| CG5381 | 46.1005   | 12.6364  | 0.27411 | 0.00561 |
| CG5804 | 267.2140  | 0.0000   | 0.00000 | 0.00174 |
| CG5830 | 162.1450  | 80.2979  | 0.49522 | 0.00334 |
| CG5853 | 88.4155   | 26.1122  | 0.29533 | 0.00096 |
| CG5910 | 39.0743   | 3.5508   | 0.09087 | 0.00227 |
| CG5958 | 1026.3700 | 428.3170 | 0.41732 | 0.00144 |
| CG6043 | 32.5517   | 6.9578   | 0.21374 | 0.00032 |
| CG6388 | 92.7134   | 28.3814  | 0.30612 | 0.00301 |
| CG6672 | 151.9640  | 72.3595  | 0.47616 | 0.00080 |
| CG6972 | 86.6755   | 10.0643  | 0.11611 | 0.00012 |
| CG7203 | 103.2540  | 0.0000   | 0.00000 | 0.00001 |



|        |           |          |         |         |
|--------|-----------|----------|---------|---------|
| CG7203 | 103.2540  | 0.0000   | 0.00000 | 0.00001 |
| CG7298 | 226.4770  | 2.8344   | 0.01252 | 0.00000 |
| CG7675 | 82.4901   | 34.9946  | 0.42423 | 0.00001 |
| CG7715 | 105.4550  | 0.0000   | 0.00000 | 0.00035 |
| CG7920 | 179.5330  | 61.1720  | 0.34073 | 0.00001 |
| CG7998 | 352.3630  | 75.3197  | 0.21376 | 0.00000 |
| CG8086 | 16.4205   | 4.7136   | 0.28705 | 0.00745 |
| CG8193 | 835.7910  | 220.8040 | 0.26419 | 0.00007 |
| CG8303 | 39.5537   | 12.0205  | 0.30390 | 0.00285 |
| CG8630 | 41.7814   | 1.5594   | 0.03732 | 0.00001 |
| CG9184 | 2626.3900 | 896.2130 | 0.34123 | 0.00000 |
| CG9331 | 163.9160  | 31.4306  | 0.19175 | 0.00010 |
| CG9380 | 101.9050  | 26.2261  | 0.25736 | 0.00000 |
| CG9416 | 159.5170  | 72.8624  | 0.45677 | 0.00637 |
| CG9527 | 52.0325   | 12.0834  | 0.23223 | 0.00155 |

|          |           |          |         |         |
|----------|-----------|----------|---------|---------|
| CG9603   | 1277.9900 | 593.6690 | 0.46453 | 0.00003 |
| CG9619   | 23.3602   | 4.1184   | 0.17630 | 0.00006 |
| CG9743   | 121.2990  | 43.6324  | 0.35971 | 0.00018 |
| CG9747   | 109.8010  | 38.4442  | 0.35013 | 0.00073 |
| CG9850   | 16.3071   | 1.7034   | 0.10446 | 0.00034 |
| CG9990   | 38.8872   | 3.9755   | 0.10223 | 0.00001 |
| cher     | 268.4920  | 90.8359  | 0.33832 | 0.00000 |
| chrb     | 524.0690  | 248.8120 | 0.47477 | 0.00065 |
| Cht3     | 183.3590  | 39.5191  | 0.21553 | 0.00000 |
| Cpr62Bc  | 73.4912   | 3.4134   | 0.04645 | 0.00006 |
| Cpr65Ea  | 768.1140  | 33.2480  | 0.04329 | 0.00000 |
| cpx      | 64.3182   | 14.6317  | 0.22749 | 0.00010 |
| CRMP     | 86.8474   | 31.3974  | 0.36152 | 0.00227 |
| CYLD     | 137.7420  | 46.6807  | 0.33890 | 0.00405 |
| Cyp309a2 | 51.1353   | 13.0595  | 0.25539 | 0.00027 |

|           |           |          |         |         |
|-----------|-----------|----------|---------|---------|
| deltaCOP  | 280.8840  | 141.0960 | 0.50233 | 0.00001 |
| dpr7      | 45.0698   | 6.2485   | 0.13864 | 0.00272 |
| drpr      | 80.2505   | 40.6775  | 0.50688 | 0.00000 |
| emp       | 91.7095   | 23.7796  | 0.25929 | 0.00040 |
| Epac      | 44.0771   | 13.2918  | 0.30156 | 0.00006 |
| eya       | 64.8562   | 23.1432  | 0.35684 | 0.00510 |
| fau       | 135.1110  | 0.0000   | 0.00000 | 0.00000 |
| fok       | 231.0960  | 100.3170 | 0.43409 | 0.00547 |
| Gad1      | 24.8103   | 1.6205   | 0.06531 | 0.00002 |
| Galpha73B | 30.3547   | 0.9903   | 0.03262 | 0.00615 |
| Gasp      | 1254.2300 | 379.6490 | 0.30270 | 0.00000 |
| Gel       | 113.5200  | 36.9592  | 0.32557 | 0.00059 |
| Gfat1     | 112.0150  | 30.1142  | 0.26884 | 0.00008 |
| Gfat2     | 148.8290  | 67.0459  | 0.45049 | 0.00280 |
| Glut1     | 64.3970   | 25.5972  | 0.39749 | 0.00155 |

|           |            |           |         |         |
|-----------|------------|-----------|---------|---------|
| Got2      | 92.7271    | 24.2257   | 0.26126 | 0.00179 |
| Gpo-1     | 42.2637    | 4.4773    | 0.10594 | 0.00011 |
| grn       | 103.0120   | 50.6430   | 0.49162 | 0.00188 |
| haf       | 127.1860   | 60.3035   | 0.47414 | 0.00462 |
| ia2       | 24.9502    | 0.9657    | 0.03870 | 0.00000 |
| ImpL3     | 354.4180   | 65.5088   | 0.18484 | 0.00000 |
| iotaTry   | 23222.1000 | 7344.8800 | 0.31629 | 0.00000 |
| kdn       | 406.4710   | 191.7070  | 0.47164 | 0.00196 |
| l(2)01289 | 34.9121    | 1.5863    | 0.04544 | 0.00000 |
| l(2)03709 | 453.0830   | 212.6080  | 0.46925 | 0.00169 |
| l(2)efl   | 139.5990   | 5.9545    | 0.04265 | 0.00003 |
| LamC      | 181.5150   | 37.5050   | 0.20662 | 0.00000 |
| mas       | 155.4540   | 60.9205   | 0.39189 | 0.00084 |
| mbl       | 182.6290   | 86.3384   | 0.47275 | 0.00398 |
| Megalin   | 194.0080   | 47.3070   | 0.24384 | 0.00000 |

|          |          |          |         |         |
|----------|----------|----------|---------|---------|
| Mf       | 160.0220 | 1.6157   | 0.01010 | 0.00000 |
| Mhc      | 726.6050 | 38.8825  | 0.05351 | 0.00000 |
| Mipp1    | 223.4110 | 112.1830 | 0.50214 | 0.00691 |
| Mlc1     | 837.2200 | 56.5194  | 0.06751 | 0.00000 |
| Mlc2     | 738.3910 | 68.5564  | 0.09285 | 0.00000 |
| Mob2     | 63.0313  | 25.5342  | 0.40510 | 0.00001 |
| Msp-300  | 156.9930 | 43.6981  | 0.27834 | 0.00000 |
| Msr-110  | 183.3070 | 40.4618  | 0.22073 | 0.00000 |
| mura     | 149.8970 | 53.8473  | 0.35923 | 0.00007 |
| n-syb    | 38.6363  | 3.4608   | 0.08957 | 0.00022 |
| Nckx30C  | 18.8468  | 2.6763   | 0.14200 | 0.00002 |
| Nep2     | 121.8840 | 43.4931  | 0.35684 | 0.00157 |
| Nnfla    | 162.6400 | 45.1467  | 0.27759 | 0.00213 |
| Nurf-38  | 324.2540 | 155.6600 | 0.48005 | 0.00255 |
| Oatp33Ea | 44.0468  | 12.5061  | 0.28393 | 0.00338 |

|            |          |          |         |         |
|------------|----------|----------|---------|---------|
| Obp44a     | 206.1100 | 0.0000   | 0.00000 | 0.00008 |
| obst-E     | 62.6213  | 0.9349   | 0.01493 | 0.00005 |
| pgant3     | 67.1310  | 26.2108  | 0.39044 | 0.00028 |
| Pgm        | 730.4410 | 149.3760 | 0.20450 | 0.00588 |
| Pif1A      | 60.5008  | 21.7064  | 0.35878 | 0.00001 |
| PKD        | 77.6680  | 24.3038  | 0.31292 | 0.00075 |
| PQBP-1     | 78.8846  | 38.2711  | 0.48515 | 0.00206 |
| ps         | 360.4450 | 174.2810 | 0.48352 | 0.00000 |
| Rab-RP4    | 495.6050 | 62.7785  | 0.12667 | 0.00262 |
| Rab7       | 496.8930 | 236.2550 | 0.47546 | 0.00496 |
| Rbp6       | 68.6119  | 9.4344   | 0.13750 | 0.00001 |
| rec        | 24.9292  | 6.0120   | 0.24116 | 0.00236 |
| RhoGAP100F | 38.6191  | 15.9435  | 0.41284 | 0.00011 |
| rut        | 47.1320  | 20.9665  | 0.44485 | 0.00042 |
| Rya-r44F   | 62.7417  | 27.0400  | 0.43097 | 0.00065 |

|              |           |          |         |         |
|--------------|-----------|----------|---------|---------|
| salm         | 131.1010  | 62.0813  | 0.47354 | 0.00000 |
| scaf         | 101.2600  | 16.3263  | 0.16123 | 0.00000 |
| SeIG         | 148.5730  | 47.7733  | 0.32155 | 0.00167 |
| serp         | 422.5820  | 155.8250 | 0.36875 | 0.00000 |
| sgl          | 271.7720  | 127.0570 | 0.46751 | 0.00501 |
| slo          | 17.1657   | 4.4506   | 0.25927 | 0.00414 |
| Spn77Ba      | 21.9980   | 1.1494   | 0.05225 | 0.00544 |
| Strn-Mlck    | 25.6701   | 6.5128   | 0.25371 | 0.00000 |
| sv           | 61.5652   | 26.8702  | 0.43645 | 0.00333 |
| synaptogyrin | 24.1509   | 2.5238   | 0.10450 | 0.00089 |
| Syt1         | 26.7950   | 7.0848   | 0.26441 | 0.00062 |
| Tace         | 57.4618   | 16.9370  | 0.29475 | 0.00417 |
| TepII        | 85.7617   | 36.8163  | 0.42929 | 0.00575 |
| Tina-1       | 376.2530  | 92.1554  | 0.24493 | 0.00006 |
| Tm1          | 1179.4600 | 590.3450 | 0.50052 | 0.00000 |

|         |           |          |         |         |
|---------|-----------|----------|---------|---------|
| Tm2     | 236.8290  | 23.4468  | 0.09900 | 0.00000 |
| Tpi     | 85.7148   | 26.3455  | 0.30736 | 0.00735 |
| TpnC47D | 1137.7500 | 43.3073  | 0.03806 | 0.00000 |
| TpnC73F | 310.8360  | 45.3916  | 0.14603 | 0.00000 |
| trol    | 92.6705   | 14.6083  | 0.15764 | 0.00000 |
| Tsp42Ea | 98.0492   | 46.6541  | 0.47582 | 0.00832 |
| TwdlL   | 187.6780  | 0.0000   | 0.00000 | 0.00000 |
| Uhg5    | 276.9450  | 101.8660 | 0.36782 | 0.00362 |
| Unc-89  | 17.9081   | 1.4018   | 0.07828 | 0.00000 |
| up      | 496.6070  | 36.6903  | 0.07388 | 0.00000 |
| usnp    | 239.4150  | 96.9262  | 0.40484 | 0.00781 |
| Vha13   | 599.8410  | 275.5040 | 0.45929 | 0.00003 |
| Vha68-1 | 82.3499   | 33.4698  | 0.40643 | 0.00045 |
| vig     | 385.8230  | 153.7520 | 0.39851 | 0.00000 |
| vkg     | 156.3580  | 31.1849  | 0.19945 | 0.00000 |



|        |          |          |         |         |
|--------|----------|----------|---------|---------|
| wupA   | 387.3000 | 27.5334  | 0.07109 | 0.00000 |
| Zasp66 | 87.0525  | 1.1663   | 0.01340 | 0.00003 |
| Zn72D  | 139.6570 | 57.0876  | 0.40877 | 0.00230 |
| zormin | 47.2647  | 10.4859  | 0.22185 | 0.00000 |
| AcpH-1 | 43.4594  | 241.1100 | 5.54793 | 0.00000 |
| AefI   | 146.4810 | 297.2880 | 2.02954 | 0.00478 |
| aPKC   | 121.9500 | 279.3850 | 2.29097 | 0.00001 |
| Art1   | 242.4790 | 531.7740 | 2.19307 | 0.00118 |
| Ate1   | 39.0081  | 73.1226  | 1.87455 | 0.00308 |
| aub    | 56.4823  | 98.7710  | 1.74871 | 0.00793 |
| ball   | 171.4560 | 333.7020 | 1.94628 | 0.00034 |
| Bap60  | 421.5060 | 697.0230 | 1.65365 | 0.00036 |
| bcd    | 63.8502  | 160.6040 | 2.51533 | 0.00078 |
| BicC   | 27.4546  | 107.4950 | 3.91537 | 0.00001 |
| BicD   | 111.1150 | 206.2440 | 1.85613 | 0.00057 |

|         |          |          |         |         |
|---------|----------|----------|---------|---------|
| borr    | 313.7790 | 629.6920 | 2.00680 | 0.00021 |
| Bsg25D  | 146.2920 | 276.9470 | 1.89311 | 0.00038 |
| BubR1   | 80.5678  | 180.9800 | 2.24630 | 0.00005 |
| bur     | 180.8900 | 338.4700 | 1.87113 | 0.00121 |
| CG10083 | 102.4790 | 201.0980 | 1.96234 | 0.00012 |
| CG11164 | 76.2473  | 199.2020 | 2.61257 | 0.00722 |
| CG12391 | 161.1550 | 321.4480 | 1.99464 | 0.00737 |
| CG12734 | 73.7598  | 145.6700 | 1.97493 | 0.00006 |
| CG14435 | 36.5679  | 99.6366  | 2.72470 | 0.00030 |
| CG14764 | 163.1420 | 353.1810 | 2.16487 | 0.00004 |
| CG15141 | 163.9630 | 351.3140 | 2.14264 | 0.00609 |
| CG1518  | 247.8010 | 384.9000 | 1.55326 | 0.00167 |
| CG16970 | 4.5993   | 23.3453  | 5.07585 | 0.00528 |
| CG1962  | 198.9030 | 413.9530 | 2.08118 | 0.00175 |
| CG2051  | 205.5650 | 419.1920 | 2.03922 | 0.00818 |

|         |          |          |         |         |
|---------|----------|----------|---------|---------|
| CG2924  | 364.3240 | 729.1350 | 2.00133 | 0.00000 |
| CG2938  | 75.4931  | 176.2400 | 2.33451 | 0.00173 |
| CG30085 | 125.2360 | 343.5470 | 2.74318 | 0.00000 |
| CG30497 | 278.0410 | 538.4850 | 1.93671 | 0.00016 |
| CG31755 | 24.9920  | 69.3976  | 2.77679 | 0.00188 |
| CG31875 | 17.2983  | 103.0400 | 5.95669 | 0.00063 |
| CG3227  | 144.5160 | 332.4690 | 2.30057 | 0.00345 |
| CG32365 | 63.6367  | 164.4680 | 2.58449 | 0.00220 |
| CG3238  | 66.1893  | 193.1280 | 2.91780 | 0.00036 |
| CG33181 | 55.1074  | 139.6530 | 2.53420 | 0.00146 |
| CG42351 | 16.7495  | 62.3572  | 3.72293 | 0.00515 |
| CG42732 | 5.1984   | 16.5247  | 3.17884 | 0.00448 |
| CG4300  | 321.5820 | 670.3470 | 2.08453 | 0.00000 |
| CG4911  | 243.5320 | 419.8970 | 1.72420 | 0.00541 |
| CG5003  | 117.4080 | 221.5270 | 1.88682 | 0.00664 |

|        |          |          |         |         |
|--------|----------|----------|---------|---------|
| CG5098 | 51.4592  | 113.8990 | 2.21339 | 0.00398 |
| CG5568 | 22.7570  | 61.9223  | 2.72102 | 0.00439 |
| CG6051 | 128.0830 | 383.6580 | 2.99538 | 0.00000 |
| CG6241 | 55.6652  | 133.7950 | 2.40357 | 0.00432 |
| CG6425 | 43.2409  | 117.9910 | 2.72869 | 0.00411 |
| CG6461 | 30.9774  | 127.6630 | 4.12116 | 0.00000 |
| CG7357 | 89.1638  | 221.8540 | 2.48816 | 0.00419 |
| CG7433 | 115.4730 | 434.6690 | 3.76427 | 0.00000 |
| CG7824 | 64.8566  | 184.4170 | 2.84345 | 0.00450 |
| CG8116 | 154.2400 | 285.7130 | 1.85239 | 0.00471 |
| CG8173 | 159.6780 | 380.9250 | 2.38560 | 0.00012 |
| CG8177 | 123.7370 | 243.6640 | 1.96922 | 0.00000 |
| CG8290 | 73.7468  | 142.1180 | 1.92711 | 0.00721 |
| CG8944 | 109.7400 | 194.5750 | 1.77306 | 0.00573 |
| CG9062 | 82.6832  | 185.9320 | 2.24873 | 0.00020 |

|              |           |           |         |         |
|--------------|-----------|-----------|---------|---------|
| CG9393       | 135.6090  | 303.3170  | 2.23671 | 0.00002 |
| chif         | 171.8770  | 342.3200  | 1.99166 | 0.00000 |
| cnn          | 178.3990  | 374.4030  | 2.09868 | 0.00095 |
| coro         | 201.5780  | 359.2250  | 1.78206 | 0.00018 |
| Cpsf160      | 86.3761   | 182.3080  | 2.11064 | 0.00151 |
| crm          | 101.2880  | 178.3820  | 1.76114 | 0.00168 |
| CycA         | 552.3510  | 939.0740  | 1.70014 | 0.00003 |
| CycB         | 1287.3700 | 2954.1100 | 2.29469 | 0.00023 |
| Edc3         | 114.6820  | 241.3340  | 2.10437 | 0.00226 |
| exu          | 16.0356   | 63.6793   | 3.97110 | 0.00044 |
| fl(2)d       | 200.3200  | 343.5310  | 1.71491 | 0.00055 |
| for          | 168.6020  | 330.3640  | 1.95943 | 0.00352 |
| fs(2)ltoPP43 | 149.0240  | 291.3330  | 1.95493 | 0.00133 |
| G-ialpha65A  | 322.3930  | 630.7580  | 1.95649 | 0.00003 |
| Gap69C       | 131.7660  | 218.4400  | 1.65778 | 0.00320 |

|            |           |           |         |         |
|------------|-----------|-----------|---------|---------|
| hang       | 222.0300  | 391.2560  | 1.76218 | 0.00346 |
| heix       | 161.8620  | 264.4980  | 1.63410 | 0.00008 |
| HP5        | 146.5290  | 289.1320  | 1.97320 | 0.00474 |
| l(1)G0269  | 106.2820  | 165.2180  | 1.55453 | 0.00305 |
| Lk6        | 434.1760  | 776.2680  | 1.78791 | 0.00809 |
| LpR2       | 33.5198   | 78.2008   | 2.33297 | 0.00120 |
| Mapmodulin | 485.4570  | 951.0330  | 1.95905 | 0.00023 |
| mol        | 116.6800  | 285.0380  | 2.44289 | 0.00000 |
| mrj        | 201.0180  | 371.7790  | 1.84948 | 0.00130 |
| Msh6       | 27.7488   | 67.7988   | 2.44332 | 0.00697 |
| muskelin   | 106.5290  | 340.6590  | 3.19780 | 0.00001 |
| ncd        | 178.4470  | 379.7040  | 2.12783 | 0.00009 |
| Nlp        | 1328.1400 | 2396.1700 | 1.80415 | 0.00820 |
| norpA      | 13.8622   | 41.4837   | 2.99258 | 0.00265 |
| Not1       | 363.3890  | 603.0990  | 1.65965 | 0.00000 |

|           |          |          |         |         |
|-----------|----------|----------|---------|---------|
| Nuf2      | 99.5041  | 183.2350 | 1.84148 | 0.00297 |
| Obp56a    | 0.0000   | 161.2760 | und     | 0.00157 |
| otu       | 18.2523  | 56.1326  | 3.07537 | 0.00350 |
| PEK       | 150.9750 | 288.4890 | 1.91084 | 0.00427 |
| Pink1     | 110.5080 | 203.3170 | 1.83983 | 0.00350 |
| Pmm45A    | 111.6540 | 296.5350 | 2.65584 | 0.00034 |
| Poc1      | 81.7573  | 196.7340 | 2.40632 | 0.00711 |
| poe       | 133.7730 | 214.7520 | 1.60534 | 0.00003 |
| proPO-A1  | 43.5178  | 222.5680 | 5.11442 | 0.00000 |
| ptip      | 65.7316  | 118.5520 | 1.80357 | 0.00011 |
| ptr       | 22.4477  | 43.1218  | 1.92099 | 0.00781 |
| Pxt       | 26.5660  | 117.9900 | 4.44139 | 0.00003 |
| Rcd1      | 197.9670 | 319.0070 | 1.61142 | 0.00193 |
| RhoGAP54D | 30.3514  | 72.4985  | 2.38864 | 0.00750 |
| rig       | 58.3268  | 108.5820 | 1.86161 | 0.00732 |

|              |          |           |         |         |
|--------------|----------|-----------|---------|---------|
| Ripalpha     | 106.0340 | 392.3240  | 3.69996 | 0.00003 |
| RPA2         | 104.9070 | 372.4870  | 3.55067 | 0.00091 |
| RpII215      | 232.9340 | 372.1600  | 1.59771 | 0.00281 |
| Rpt4         | 327.0040 | 623.6410  | 1.90714 | 0.00051 |
| SMC2         | 96.7567  | 200.4190  | 2.07136 | 0.00005 |
| smg          | 750.2190 | 2228.2500 | 2.97014 | 0.00000 |
| ssp3         | 47.9181  | 104.9210  | 2.18959 | 0.00326 |
| sti          | 185.6460 | 353.5520  | 1.90444 | 0.00323 |
| Su(var)2-10  | 322.9430 | 560.4340  | 1.73540 | 0.00000 |
| Su(var)2-HP2 | 112.7700 | 207.5120  | 1.84013 | 0.00519 |
| Taf12        | 179.4620 | 399.9310  | 2.22851 | 0.00021 |
| thr          | 115.3340 | 328.6780  | 2.84980 | 0.00001 |
| tlk          | 246.1990 | 403.7060  | 1.63976 | 0.00001 |
| tor          | 38.6324  | 94.7882   | 2.45360 | 0.00091 |
| Trf4-1       | 160.3040 | 315.3580  | 1.96725 | 0.00279 |



|        |          |          |         |         |
|--------|----------|----------|---------|---------|
| tum    | 258.8920 | 528.6690 | 2.04205 | 0.00212 |
| twe    | 138.3430 | 396.1770 | 2.86374 | 0.00000 |
| Uba2   | 244.0670 | 419.2780 | 1.71788 | 0.00008 |
| UbcD2  | 318.5530 | 673.5540 | 2.11442 | 0.00027 |
| Uch-L3 | 169.4910 | 324.7130 | 1.91581 | 0.00775 |
| Uev1A  | 574.7470 | 923.3250 | 1.60649 | 0.00280 |
| Usp7   | 202.0050 | 337.6360 | 1.67142 | 0.00000 |
| vlc    | 283.0970 | 505.1150 | 1.78425 | 0.00001 |
| wapl   | 115.2550 | 253.6930 | 2.20115 | 0.00041 |
| wdn    | 127.8800 | 229.4830 | 1.79452 | 0.00280 |
| yuri   | 19.1355  | 71.9366  | 3.75932 | 0.00024 |

Downregulated transcripts are shaded red; upregulated transcripts are shaded green.

---

**Table S3. Differential isoform expression in 6-10hr *hoip*<sup>1</sup> embryos**

| <b>Gene</b> | <b>Wild-type value</b> | <b><i>hoip</i> value</b> | <b>Fold change</b> | <b><i>P</i> value</b> | <b>Transcript defect</b> |
|-------------|------------------------|--------------------------|--------------------|-----------------------|--------------------------|
| aub         | 56.48230               | 98.77100                 | 1.74871            | 0.00793               | Enhanced splicing        |
| ptip        | 65.73160               | 118.55200                | 1.80357            | 0.00011               | Enhanced splicing        |
| sti         | 185.64600              | 353.55200                | 1.90444            | 0.00323               | Enhanced splicing        |
| CG8177      | 123.73700              | 243.66400                | 1.96922            | 0.00000               | Enhanced splicing        |
| CG42748     | 175.85800              | 90.52090                 | 0.51474            | 0.00432               | Exon inclusion           |
| kcc         | 89.84850               | 46.96120                 | 0.52267            | 0.00085               | Exon inclusion           |
| Ser         | 84.99020               | 44.45880                 | 0.52311            | 0.00064               | Exon inclusion           |
| Ppn         | 555.02200              | 306.51800                | 0.55226            | 0.00000               | Exon inclusion           |
| Ca-P60A     | 498.64100              | 275.82100                | 0.55315            | 0.00723               | Exon inclusion           |
| CG32000     | 480.65000              | 268.36300                | 0.55834            | 0.00024               | Exon inclusion           |
| hth         | 835.08400              | 505.59300                | 0.60544            | 0.00059               | Exon inclusion           |
| Mbs         | 167.98500              | 107.22400                | 0.63830            | 0.00395               | Exon inclusion           |

|                  |           |           |         |         |                |
|------------------|-----------|-----------|---------|---------|----------------|
| tlk              | 246.19900 | 403.70600 | 1.63976 | 0.00001 | Exon inclusion |
| Su(var)2-<br>HP2 | 112.77000 | 207.51200 | 1.84013 | 0.00519 | Exon inclusion |
| rig              | 58.32680  | 108.58200 | 1.86161 | 0.00732 | Exon inclusion |
| ptr              | 22.44770  | 43.12180  | 1.92099 | 0.00781 | Exon inclusion |
| CG8290           | 73.74680  | 142.11800 | 1.92711 | 0.00721 | Exon inclusion |
| chif             | 171.87700 | 342.32000 | 1.99166 | 0.00000 | Exon inclusion |
| bip2             | 311.99200 | 203.80600 | 0.65324 | 0.00047 | Exon skipping  |
| Atpalpha         | 619.91700 | 429.29900 | 0.69251 | 0.00385 | Exon skipping  |
| dikar            | 85.61790  | 120.58700 | 1.40843 | 0.00286 | Exon skipping  |
| CG1518           | 247.80100 | 384.90000 | 1.55326 | 0.00167 | Exon skipping  |
| Su(var)2-<br>10  | 322.94300 | 560.43400 | 1.73540 | 0.00000 | Exon skipping  |
| vlc              | 283.09700 | 505.11500 | 1.78425 | 0.00001 | Exon skipping  |
| Ate1             | 39.00810  | 73.12260  | 1.87455 | 0.00308 | Exon skipping  |
| for              | 168.60200 | 330.36400 | 1.95943 | 0.00352 | Exon skipping  |

|                 |           |           |         |         |                              |
|-----------------|-----------|-----------|---------|---------|------------------------------|
| shot            | 177.77600 | 112.71300 | 0.63401 | 0.00722 | Exon skipping/exon inclusion |
| mrj             | 201.01800 | 371.77900 | 1.84948 | 0.00130 | Exon skipping/exon inclusion |
| sano            | 95.19750  | 52.42650  | 0.55071 | 0.00662 | Exon skipping/inclusion      |
| CG34417         | 31.43320  | 16.63610  | 0.52925 | 0.00058 | No splicing                  |
| mrt             | 79.34430  | 42.20550  | 0.53193 | 0.00438 | No splicing                  |
| sm              | 266.06100 | 135.89400 | 0.51076 | 0.00830 | Reduced splicing             |
| erol            | 319.13200 | 169.49200 | 0.53110 | 0.00000 | Reduced splicing             |
| fz2             | 300.78100 | 160.47500 | 0.53353 | 0.00062 | Reduced splicing             |
| if              | 86.65180  | 48.43270  | 0.55893 | 0.00119 | Reduced splicing             |
| VhaSFD          | 325.35600 | 182.20800 | 0.56003 | 0.00003 | Reduced splicing             |
| CG14425,<br>Sxl | 368.62100 | 209.39300 | 0.56804 | 0.00010 | Reduced splicing             |
| CG14767         | 311.92900 | 178.67400 | 0.57280 | 0.00070 | Reduced splicing             |
| PNUTS           | 187.48500 | 107.55800 | 0.57369 | 0.00145 | Reduced splicing             |
| Pdp1            | 154.50300 | 89.82400  | 0.58137 | 0.00835 | Reduced splicing             |

|                  |            |            |         |         |                  |
|------------------|------------|------------|---------|---------|------------------|
| A2bp1            | 203.49100  | 118.55600  | 0.58261 | 0.00818 | Reduced splicing |
| ct               | 94.26300   | 56.17210   | 0.59591 | 0.00489 | Reduced splicing |
| rictor           | 83.02180   | 49.61840   | 0.59766 | 0.00072 | Reduced splicing |
| nkd              | 215.54700  | 130.30700  | 0.60454 | 0.00083 | Reduced splicing |
| Cirl             | 438.24000  | 271.95700  | 0.62057 | 0.00068 | Reduced splicing |
| par-1            | 190.83200  | 124.93800  | 0.65470 | 0.00019 | Reduced splicing |
| Aats-<br>glupro  | 212.19200  | 140.44800  | 0.66189 | 0.00034 | Reduced splicing |
| grh              | 178.67900  | 123.00500  | 0.68841 | 0.00292 | Reduced splicing |
| Rcd1             | 197.96700  | 319.00700  | 1.61142 | 0.00193 | Reduced splicing |
| hang             | 222.03000  | 391.25600  | 1.76218 | 0.00346 | Reduced splicing |
| Nlp              | 1328.14000 | 2396.17000 | 1.80415 | 0.00820 | Reduced splicing |
| fs(2)ltoPP<br>43 | 149.02400  | 291.33300  | 1.95493 | 0.00133 | Reduced splicing |
| G-<br>ialpha65A  | 322.39300  | 630.75800  | 1.95649 | 0.00003 | Reduced splicing |

|          |           |           |         |         |                                 |
|----------|-----------|-----------|---------|---------|---------------------------------|
| cpo      | 180.11500 | 105.18600 | 0.58399 | 0.00013 | Reduced splicing/exon inclusion |
| Pvr      | 126.49100 | 75.74530  | 0.59882 | 0.00122 | Reduced splicing/exon inclusion |
| Eip75B   | 341.18800 | 207.52200 | 0.60823 | 0.00418 | Reduced splicing/exon skipping  |
| l(3)82Fd | 159.89400 | 100.41200 | 0.62799 | 0.00255 | Reduced splicing/exon skipping  |
| Imp      | 551.30400 | 374.13400 | 0.67863 | 0.00303 | Reduced splicing/exon skipping  |
| Dscam    | 147.12600 | 112.67700 | 0.76585 | 0.00043 | Reduced splicing/exon skipping  |

---

**Table S4. Muscle elongation, target recognition and attachment mRNA expression in *hoip*<sup>1</sup> embryos**

| <b>Gene</b>                   | <b>Muscle function</b> | <b>Fold change in <i>hoip</i><sup>1</sup> embryos*</b> | <b>Stage of muscle phenotype</b> | <b>Reference</b>                |
|-------------------------------|------------------------|--------------------------------------------------------|----------------------------------|---------------------------------|
| <i>Dynein heavy chain 64C</i> | Elongation             | NC                                                     | Stage 15                         | (Folker et al., 2012)           |
| <i>pavarotti</i>              | Elongation             | NC                                                     | Stage 16                         | (Guerin and Kramer, 2009)       |
| <i>tumbleweed</i>             | Elongation             | 2.04                                                   | Stage 14/15                      | (Guerin and Kramer, 2009)       |
| <i>derailed</i>               | Recognition            | NC                                                     | Stage 14                         | (Callahan et al., 1996)         |
| <i>echinoid</i>               | Recognition            | NC                                                     | Stage 16                         | (Swan et al., 2006)             |
| <i>kon-tiki</i>               | Recognition            | NC                                                     | Stage 13                         | (Schnorrer et al., 2007)        |
| <i>MSP-300</i>                | Recognition            | 0.27                                                   | Stage 16                         | (Rosenberg-Hasson et al., 1996) |
| <i>perdido</i>                | Recognition            | NC                                                     | Stage 13                         | (Estrada et al., 2007)          |
| <i>roundabout</i>             | Recognition            | NC                                                     | Stage 14                         | (Steigemann et al., 2004)       |
| <i>Slit</i>                   | Recognition            | 0.66                                                   | Stage 14                         | (Steigemann et al., 2004)       |
| <i>Stripe</i>                 | Recognition/           | NC                                                     | Stage 14                         | (Frommer et al., 1996)          |

|                                      |                  | attachment |      |             |                                       |
|--------------------------------------|------------------|------------|------|-------------|---------------------------------------|
| <i>Glutamate Binding Protein</i>     | <i>Receptor</i>  | Attachment | NC   | Stage 13    | (Estrada et al., 2007)                |
| <i>inflated</i>                      |                  | Attachment | 0.56 | Stage 17    | (Bloor and Brown, 1998)               |
| <i>Leucine-rich specific protein</i> | <i>tendon-</i>   | Attachment | NC   | Stage 16    | (Wayburn and Volk, 2009)              |
| <i>mind bomb 2</i>                   |                  | Attachment | NC   | Stage 15    | (Carrasco-Rando and Ruiz-Gomez, 2008) |
| <i>multiple wings</i>                | <i>edematous</i> | Attachment | NC   | Stage 16    | (Chanana et al., 2007)                |
| <i>myospheroid</i>                   |                  | Attachment | NC   | Stage 16    | (Brown, 1994)                         |
| <i>rhea</i>                          |                  | Attachment | NC   | Stage 16    | (Brown et al., 2002)                  |
| <i>slowdown</i>                      |                  | Attachment | NC   | Stage 16    | (Gilsohn and Volk, 2010a)             |
| <i>Thrombospondin</i>                |                  | Attachment | NC   | Stage 16    | (Subramanian et al., 2007)            |
| <i>Tiggrin</i>                       |                  | Attachment | NC   | Stage 16/17 | (Bunch et al., 1998)                  |
| <i>vein</i>                          |                  | Attachment | NC   | Stage 16    | (Yarnitzky et al., 1998)              |

---

\*Fold change compared with wild-type embryos



**Table S5. Possible muscle elongation regulators misexpressed in *hoip*<sup>1</sup> embryos**

| <b>Gene</b>             | <b>Molecular function</b> | <b>Fold change in<br/><i>hoip</i><sup>1</sup> embryos</b> |
|-------------------------|---------------------------|-----------------------------------------------------------|
| <i>Gelsolin</i>         | Actin binding             | 0.32                                                      |
| <i>Rab7</i>             | GTPase                    | 0.13                                                      |
| <i>Rab18</i>            | GTPase                    | 0.48                                                      |
| <i>RhoGAP54D</i>        | Rho GAP                   | 2.30                                                      |
| <i>RhoGAP100F</i>       | Rho GAP                   | 0.41                                                      |
| <i>Tetraspanin 42Ea</i> | Transmembrane protein     | 0.48                                                      |
| <i>Unc-89</i>           | Rho GEF                   | 0.07                                                      |

| <b>Table S6. Primer sequences</b> |                                       |                                      |
|-----------------------------------|---------------------------------------|--------------------------------------|
| <b>Primer</b>                     | <b>Forward primer</b>                 | <b>Reverse primer</b>                |
| <b>Site-directed mutagenesis</b>  |                                       |                                      |
| <i>hoip</i> <sup>1</sup>          | ATCAACTGCGCAAGGAAGCCAACGAGGCCAC       | GTGGCCTCGTTGGCTTCCTTGCGCAGTTGAT      |
| Hoip.-225.GFP*                    | TCTAGAACTCGCGGATGCGC                  | GGTACCAAGTGC'TTAAAATGCAACCTCTC       |
| Hoip.-225ΔE.GFP                   | TTTCTAACGCTAACGGAATTC'TTGAAAGCGAT'TTC | GAAATCGCTTTCAAAGAATTCCGTTAGCGTTAGAAA |
| <b>qPCR</b>                       |                                       |                                      |
| <i>if</i>                         | CGATCCTTCCCACGAGATTA                  | GCAGTGGATTCTACGGCAAT                 |
| <i>Mf</i>                         | TCCAAAGCAGGTTGTCATTG                  | GCCACTCGGTATCTTTGAGC                 |
| <i>MHC</i>                        | CTGTTCAAGTGGCTGGTGAA                  | AATGGGTGTTGGTCAGCTTC                 |
| <i>Mlc2</i>                       | CAGCAACTGGGTGAAGTTGA                  | CAGCCAGAGATTCAGTGTGC                 |
| <i>Tm2</i>                        | CAGCTGACCAACCAGTTGAA                  | AAATCGTCGCAGATTGCTTT                 |
| <i>TpnC 47D</i>                   | TTTATTCAAGCCTCGGGTGT                  | CAGTCGTTAGCGGTGATCG                  |
| <i>TpnC 73F</i>                   | CAACAGCTTCGATCACCAGA                  | AAGTGGGTGGTGT'TTCCAG                 |
| <i>smyhc1</i>                     | GAGGAACCAGCAGAGAGTGG                  | CAGATTGTTGCGTCTCTCCA                 |
| <i>smyhc3</i>                     | TGGAGAGACGCAACAATCTG                  | CTGCCTCCTCAACCTCAGTC                 |

|               |                        |                      |
|---------------|------------------------|----------------------|
| <i>tpma</i>   | CCCGTAAGCTGGTGATTGTT   | ACGAGTCTCAGCCTCCTTCA |
| <i>tpm2</i>   | TGCAGATGCTCAAACCTGGAC  | TTGAGCGCGATCTAACTCCT |
| <i>Mef2a</i>  | GGCTCTCCAGGGCTCTCTAT   | CATCGTAGGAGGAGCAGGAG |
| <i>Mef2d</i>  | GAGAATGCTCAGCGGTTAGG   | TGTTGCCAAGTGGTCATGTT |
| <i>notch1</i> | CGAGCCCTTGTCATTATGGT   | TCGCAGACACACTCATAGCC |
| <i>GAPDH</i>  | GATACACGGAGCACCAGGTT   | AACAGCAAAGGGGTCACATC |
| <i>Rpl32</i>  | TTACTCGTTCTCTTGAGAACGC | CTTCAAGATGACCATCCGC  |

---

\*The PCR product was digested with Kpn/EcoRI to generate the Hoip.-225 fragment
